# Supplementary material
Source: PubMed Central journal article supplement (PMC5391998)
Supplement: NIHMS860187-supplement.pdf [file NIHMS860187-supplement.pdf]

**Figure S1.**

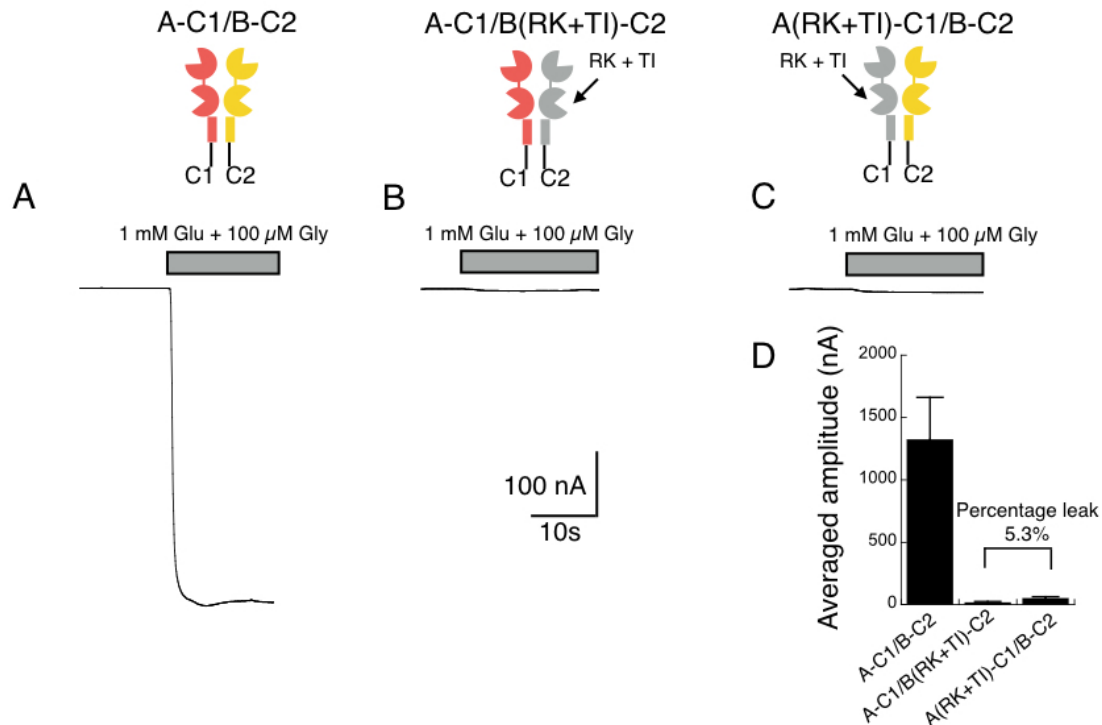

**Fig. S1.** (Related to Fig. 1, 2, 3) **Estimation of escape currents in the ER retention system for expression of triheteromeric NMDARs.** Co-expression of GluN1, GluN2A, and GluN2B subunits can produce three populations of functional NMDA receptors (i.e. A/B, A/A, and B/B), but expression of diheteromeric GluN1/2A (A/A) and GluN1/2B (B/B) receptors at the cell surface can be prevented by fusing the engineered C1 to the intracellular C-terminus of GluN2A (A-C1) and replacing the C-terminal domain of GluN2B with that of C2-tagged GluN2A (B-C2) (Hansen et al., 2014). Responses from A-C1/A-C1 and B-C2/B-C2 receptors that may have escaped ER retention (i.e. “leak” currents) can be assessed using RK+TI mutations, which abolish binding of glutamate and render NMDA receptors containing this subunit non-functional (Hansen et al., 2014). Currents activated by 1 mM glutamate plus 100  $\mu$ M glycine from *Xenopus* oocytes injected with (A) GluN1, GluN2A-C1, and GluN2B-C2 cRNAs, (B) GluN1, GluN2A-C1, and mutated GluN2B-C2 (R519K and T691I) cRNAs, or (C) GluN1, mutated GluN2A-C1 (R518K and T690I), and GluN2B-C2 cRNAs. (D) Quantification of current amplitudes of each group. Data are mean  $\pm$  SEM of current amplitudes from 6 oocytes for each group. The sum of the fractional “leak” currents assessed using the RK+TI mutations provides an estimate of the percent “leak” current in oocytes expressing triheteromeric A-C1/B-C2 receptors (Hansen et al., 2014).

**Figure S2.**

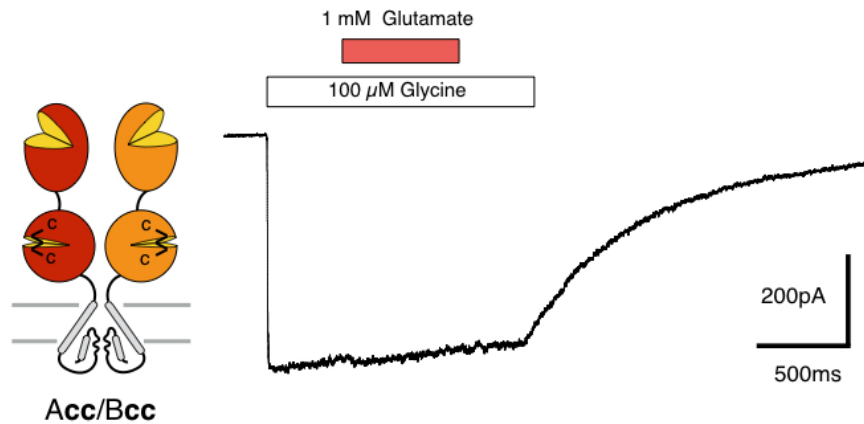

**Fig. S2.** (Related to Figure. 1) **Crosslinking of the GluN2 ligand binding domain is highly efficient.** Two cysteine mutations in GluN2A and GluN2B were designed to spontaneously form a disulfide bond that locks the ligand binding domain (LBD) in a conformation similar to the glutamate-bound state (GluN2A: K487C + N687C; GluN2B: K488C + N688C; hereafter Acc and Bcc) (Blanke and VanDongen, 2008, Kussius and Popescu, 2010, Dai and Zhou, 2016). Acc/Bcc receptors expressed on HEK-293 cells open fully when exposed to 100  $\mu$ M glycine. Addition of 1 mM glutamate did not further increase the amplitude, indicating complete formation of the engineered disulfide bond. Current amplitude in glycine alone was  $99.5 \pm 1.0$  % of the current amplitude in glutamate and glycine ( $n = 3$ ).

Figure S3.

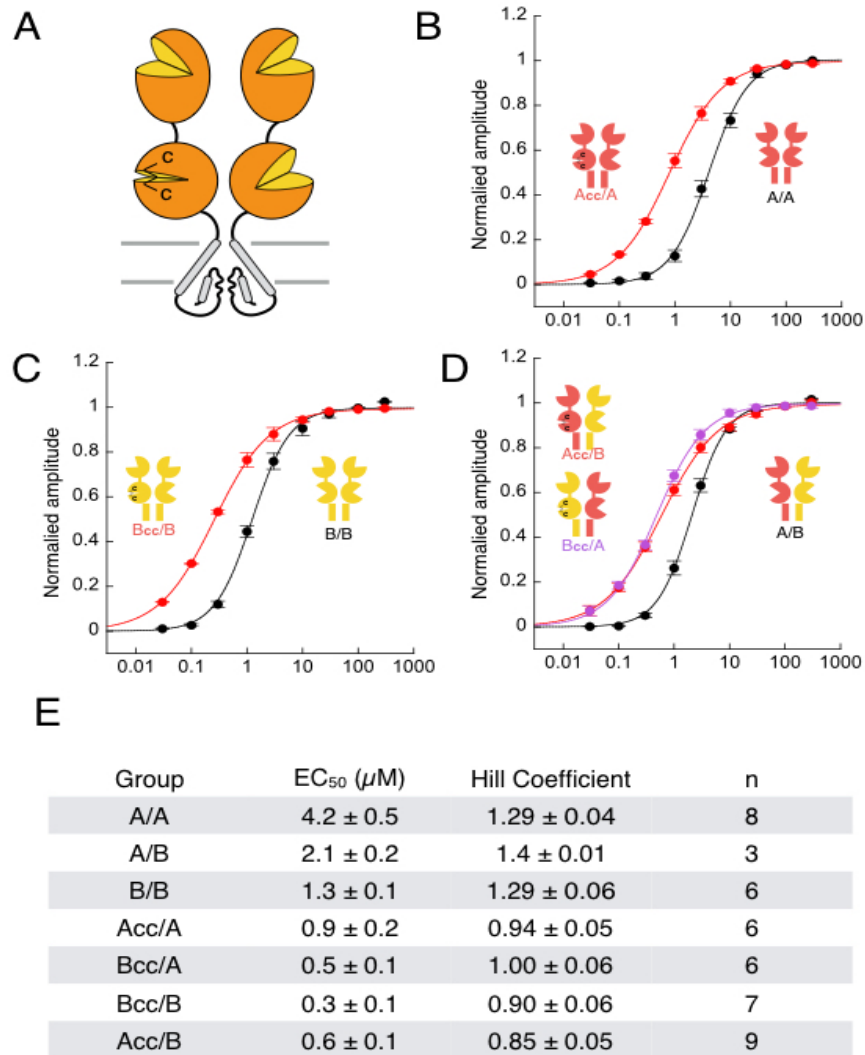

**Fig. S3.** (Related to Figure. 1) **Crosslinking a single GluN2 within NMDARs increases glutamate potency and decreases Hill coefficient.** (A) Cartoon showing LBD crosslinking of a single GluN2 subunit. (B-D) Glutamate concentration-response relationships for wild type and single-GluN2 crosslinked NMDARs expressed in *Xenopus* oocytes measured using two-electrode voltage-clamp recordings. (E) Summary of EC<sub>50</sub> values and Hill coefficients.

**Figure S4.**

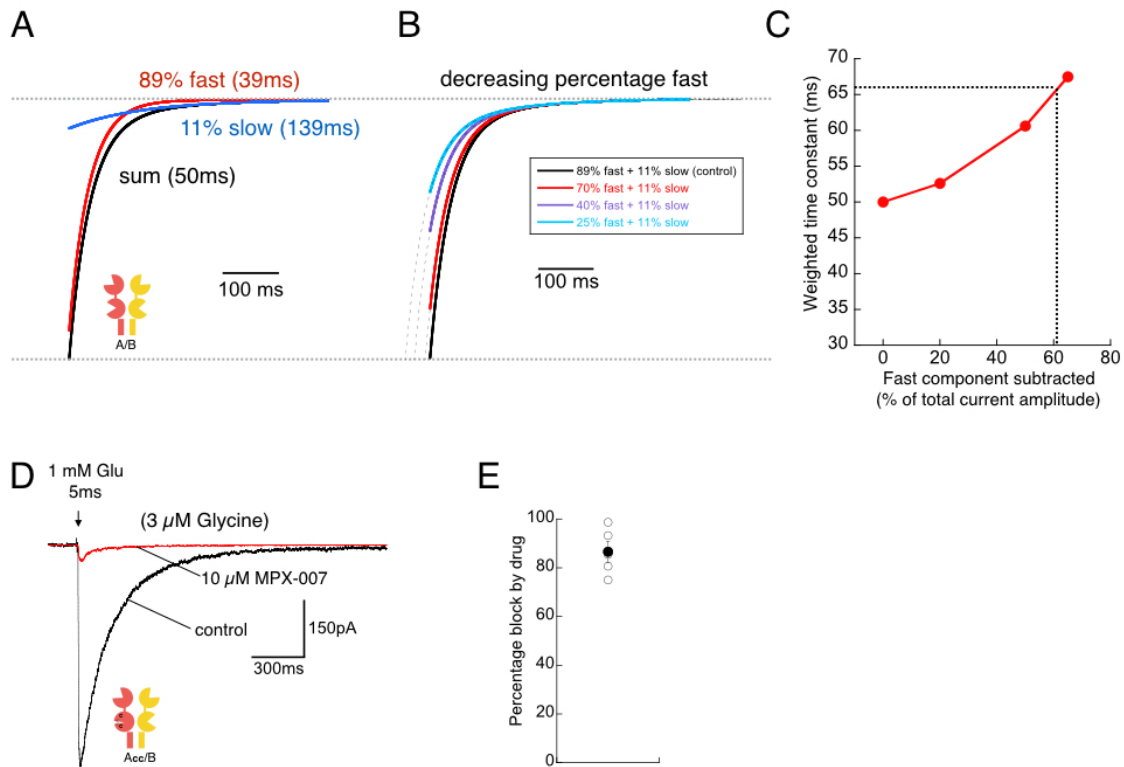

**Fig. S4.** (Related to Fig. 1 and STAR Methods) **A/B or Acc/B deactivation is not mediated by escaped A/A or B/B receptors, respectively.**

(A) The measured deactivation of A/B receptors can be fitted using a double exponential function, with 89% fast component (39 ms) and 11% slow component (139 ms). (B) Decreasing the amplitude of the fast component without changing the slow component results in a progressively slower weighted time constant, which is quantified in (C). This approach estimates that about 60% of the total current amplitude would have to be mediated by escaped A/A to cause the A/B deactivation time constant to be shifted from 66 ms to 50 ms. (D) The B/B escape current contributing to the measured Acc/B current was estimated by blocking the current using the GluN2A-selective NMDAR antagonist MPX-007 (kindly provided by Luc Therapeutics, Inc) (Volkman et al., 2016). MPX-007 at 10  $\mu$ M in the presence of 3  $\mu$ M glycine blocks >95% of GluN2A-containing receptors (i.e. A/A and A/B), but does not affect B/B diheteromeric receptors (Yi et al., 2016). (E) MPX-007 blocked Acc/B responses by  $87 \pm 4$  % (n=6), suggesting the majority of the expressed receptors contain at least one GluN2A subunit. The remaining <13% of the response, which is not inhibited by MPX-007, is mediated by unblocked A/B receptors and escaped B/B receptors.
